# Supplementary material
Source: publisher figshare collection journal article supplement (https://gsapubs.figshare.com/ndownloader/files/38829927)
Supplement: Supplementary file 1 [file 38829927]

## Sheet: Table D3 - Mean U-Pb zircon
Table S3: Mean U-Pb data on zircon for samples from the San Gabriel pluton (LA-ICP-MS data)
			Location (UTM 19S / Datum: WGS84)				Isotope ratios1						Weighted age2
Sample	Unit		E UTM	N UTM	H m.a.s.l. (*)		207Pb/235U	207Pb/235U(2σ)	206Pb/238U	206Pb/238U(2σ)	Rho		238U/206Pb age (Ma)	238U/206Pb error 2σ (Ma)	error 2σ (%)	External error %	Error % comp	Error comp (Ma)	MSWD	N points
SG2313	Los Espolones quartz-monzodiorite		385906	6261968	1600		0.0123312	0.00140674	0.00190914	6.82759e-05	0.119751		12.408	0.078	0.63	1.5	1.62693	0.201869	3.8	160
SG1903	Los Espolones quartz-monzodiorite		388770	6252766	1747		0.0130332	0.00116571	0.0019353	5.23612e-05	0.141827		12.627	0.084	0.67	1.5	1.64283	0.207441	3	63
SG2102	Los Espolones quartz-monzodiorite		387504	6254446	1506		0.0128951	0.00156086	0.00194524	5.20478e-05	0.0998293		12.852	0.071	0.55	1.5	1.59765	0.205331	2.1	82
SG2310	Los Espolones quartz-monzodiorite		385756	6262303	1819		0.0129417	0.00180855	0.00195747	5.26543e-05	0.120653		12.917	0.073	0.57	1.5	1.60465	0.207273	2.8	72
SG0104	Los Piques quartz-monzonite		387622	6255021	1551		0.012501	0.0009915	0.00193437	6.47502e-05	0.111619		12.654	0.078	0.62	1.5	1.62308	0.205385	5.4	136
SG1301	Los Piques quartz-monzonite		387417	6260878	1304		0.0124242	0.00107026	0.00191768	4.86194e-05	0.117842		12.669	0.062	0.49	1.5	1.57801	0.199917	1.8	91
SG1501	Los Piques quartz-monzonite		388953	6253607	1497		0.0125759	0.000836045	0.00194053	3.53065e-05	0.116331		12.763	0.06	0.47	1.5	1.57191	0.200623	1.01	49
SG2401	Los Piques quartz-monzonite		389740	6257529	1512		0.0125128	0.00205233	0.00193797	6.43989e-05	0.114634		12.823	0.093	0.72	1.5	1.66385	0.213356	3.2	78
SG0702	Los Piques quartz-monzonite		388280	6259800	1410		0.0133689	0.000973574	0.00202893	5.5963e-05	0.137319		13.225	0.089	0.67	1.5	1.64283	0.217265	3.4	61
SG1201	Los Piques quartz-monzonite		384990	6263070	1860		0.0130724	0.00129069	0.00193997	7.07581e-05	0.139218		12.62	0.11	0.89	1.5	1.74416	0.220113	5	63
SG2002	Los Piques quartz-monzonite		385923	6262432	2126		0.012387	0.00149356	0.00192098	4.37582e-05	0.119343		12.761	0.058	0.46	1.5	1.56895	0.200214	1.4	91
SG2512	Los Piques quartz-monzonite		386659	6262596	2128		0.0129273	0.00251217	0.00190872	6.1491e-05	0.118664		12.724	0.084	0.66	1.5	1.63878	0.208518	2.6	99
SG2607	Los Piques quartz-monzonite		389208	6258806	1802		0.0129512	0.00138181	0.00196951	5.39905e-05	0.107989		13.009	0.081	0.62	1.5	1.62308	0.211147	3.7	73
SG2504	Los Piques quartz-monzonite		386579	6261905	1627		0.0140503	0.00160625	0.00208292	7.13131e-05	0.140748		13.57	0.12	0.85	1.5	1.72409	0.23396	4.4	64
SG1001	Los Piques quartz-monzonite		384765	6261804	1299		0.0124937	0.000894524	0.00191375	4.22664e-05	0.146798		12.604	0.083	0.66	1.5	1.63878	0.206552	1.18	48
SG1901	Los Piques quartz-monzonite		388762	6252791	1662		0.0132347	0.00153311	0.00200783	6.31517e-05	0.125966		13.153	0.075	0.57	1.5	1.60465	0.21106	1.9	124
SG0802	Los Rodados monzogranite		385110	6261518	1280		0.0126993	0.00180893	0.00193104	5.74204e-05	0.121402		12.714	0.05	0.39	1.5	1.54987	0.197051	2.1	191
SG0901	Los Rodados monzogranite		386309	6261582	1406		0.0136412	0.00254474	0.00192715	7.12456e-05	0.125675		12.72	0.11	0.86	1.5	1.72905	0.219935	3.4	74
SG2205	Los Rodados monzogranite		386545	6257254	1428		0.0132362	0.00179098	0.00194355	5.37904e-05	0.141284		12.867	0.092	0.71	1.5	1.65955	0.213534	3.5	58
SG2601	Los Rodados monzogranite		388247	6258674	1475		0.0143153	0.00157642	0.00207146	6.87793e-05	0.146966		13.53	0.11	0.79	1.5	1.69532	0.229376	2.4	59
1 Average value
2 Calculated by using Isoplot
* Altitude in meters above sea level
Payacán, I., Gutiérrez, F., Bachmann, O., and Parada, M.Á., 2023, Differentiation of an upper crustal magma reservoir via crystal-melt separation recorded in the San Gabriel pluton (central Chile): Geosphere, v. 19, https://doi.org/10.1130/GES02535.1
